# Supplementary material for: Detecting prostate cancer and prostatic calcifications using advanced magnetic resonance imaging
Source: PubMed Central journal article supplement — Asian J Androl. 2016 Mar 22;19(4):439–43. doi: 10.4103/1008-682X.177840 (PMC5507089; doi:10.4103/1008-682x.177840), 2016-03-22
Supplement: AJA-19-439_Suppl1.pdf [file AJA-19-439_Suppl1.pdf]

**Supplementary Table 1: Initial patient information**

| <i>Document number</i> | <i>Age (years)</i> | <i>Histopathological diagnoses</i> | <i>Prostatic calcifications on CT images</i> | <i>Hypointense on susceptibility-filtered phase images</i> |
|------------------------|--------------------|------------------------------------|----------------------------------------------|------------------------------------------------------------|
| 1                      | 65                 | Noncancerous prostate              | Negative                                     | Negative                                                   |
| 2                      | 73                 | Noncancerous prostate              | Positive                                     | Negative                                                   |
| 3                      | 63                 | Prostate cancer                    | Negative                                     | Positive                                                   |
| 4                      | 72                 | Noncancerous prostate              | Positive                                     | Negative                                                   |
| 5                      | 73                 | Noncancerous prostate              | Positive                                     | Negative                                                   |
| 6                      | 59                 | Noncancerous prostate              | Negative                                     | Negative                                                   |
| 7                      | 75                 | Prostate cancer                    | Positive                                     | Positive                                                   |
| 8                      | 78                 | Noncancerous prostate              | Negative                                     | Negative                                                   |
| 9                      | 65                 | Noncancerous prostate              | Positive                                     | Negative                                                   |
| 10                     | 59                 | Noncancerous prostate              | Positive                                     | Negative                                                   |
| 11                     | 76                 | Prostate cancer                    | Negative                                     | Positive                                                   |
| 12                     | 62                 | Noncancerous prostate              | Positive                                     | Negative                                                   |
| 13                     | 81                 | Noncancerous prostate              | Positive                                     | Negative                                                   |
| 14                     | 71                 | Noncancerous prostate              | Positive                                     | Negative                                                   |
| 15                     | 78                 | Prostate cancer                    | Negative                                     | Positive                                                   |
| 16                     | 64                 | Noncancerous prostate              | Positive                                     | Negative                                                   |
| 17                     | 59                 | Prostate cancer                    | Negative                                     | Positive                                                   |
| 18                     | 67                 | Noncancerous prostate              | Positive                                     | Negative                                                   |
| 19                     | 72                 | Prostate cancer                    | Positive                                     | Positive                                                   |
| 20                     | 71                 | Noncancerous prostate              | Positive                                     | Negative                                                   |
| 21                     | 64                 | Noncancerous prostate              | Negative                                     | Negative                                                   |
| 22                     | 73                 | Noncancerous prostate              | Positive                                     | Negative                                                   |
| 23                     | 64                 | Noncancerous prostate              | Negative                                     | Negative                                                   |
| 24                     | 81                 | Prostate cancer                    | Negative                                     | Positive                                                   |
| 25                     | 68                 | Noncancerous prostate              | Negative                                     | Negative                                                   |
| 26                     | 57                 | Noncancerous prostate              | Positive                                     | Negative                                                   |
| 27                     | 61                 | Prostate cancer                    | Negative                                     | Positive                                                   |
| 28                     | 78                 | Noncancerous prostate              | Positive                                     | Negative                                                   |
| 29                     | 56                 | Noncancerous prostate              | Negative                                     | Negative                                                   |
| 30                     | 58                 | Noncancerous prostate              | Positive                                     | Negative                                                   |
| 31                     | 73                 | Noncancerous prostate              | Positive                                     | Negative                                                   |
| 32                     | 67                 | Prostate cancer                    | Negative                                     | Positive                                                   |
| 33                     | 62                 | Noncancerous prostate              | Positive                                     | Negative                                                   |
| 34                     | 59                 | Noncancerous prostate              | Negative                                     | Negative                                                   |
| 35                     | 61                 | Noncancerous prostate              | Negative                                     | Negative                                                   |
| 36                     | 66                 | Noncancerous prostate              | Positive                                     | Negative                                                   |
| 37                     | 70                 | Noncancerous prostate              | Positive                                     | Negative                                                   |
| 38                     | 74                 | Noncancerous prostate              | Positive                                     | Negative                                                   |
| 39                     | 57                 | Prostate cancer                    | Negative                                     | Positive                                                   |
| 40                     | 68                 | Noncancerous prostate              | Positive                                     | Negative                                                   |
| 41                     | 61                 | Noncancerous prostate              | Negative                                     | Negative                                                   |
| 42                     | 72                 | Noncancerous prostate              | Positive                                     | Negative                                                   |
| 43                     | 63                 | Prostate cancer                    | Negative                                     | Positive                                                   |
| 44                     | 62                 | Noncancerous prostate              | Positive                                     | Negative                                                   |
| 45                     | 74                 | Noncancerous prostate              | Positive                                     | Negative                                                   |
| 46                     | 62                 | Noncancerous prostate              | Negative                                     | Negative                                                   |
| 47                     | 65                 | Noncancerous prostate              | Positive                                     | Negative                                                   |
| 48                     | 72                 | Prostate cancer                    | Negative                                     | Positive                                                   |
| 49                     | 76                 | Noncancerous prostate              | Positive                                     | Negative                                                   |
| 50                     | 74                 | Noncancerous prostate              | Positive                                     | Negative                                                   |
| 51                     | 68                 | Noncancerous prostate              | Negative                                     | Negative                                                   |
| 52                     | 69                 | Prostate cancer                    | Positive                                     | Positive                                                   |
| 53                     | 64                 | Noncancerous prostate              | Negative                                     | Negative                                                   |
| 54                     | 72                 | Noncancerous prostate              | Positive                                     | Negative                                                   |
| 55                     | 83                 | Noncancerous prostate              | Positive                                     | Negative                                                   |

Contd...

**Supplementary Table 1: Contd...**

| <i>Document number</i> | <i>Age (years)</i> | <i>Histopathological diagnoses</i> | <i>Prostatic calcifications on CT images</i> | <i>Hypointense on susceptibility-filtered phase images</i> |
|------------------------|--------------------|------------------------------------|----------------------------------------------|------------------------------------------------------------|
| 56                     | 65                 | Prostate cancer                    | Negative                                     | Positive                                                   |
| 57                     | 58                 | Noncancerous prostate              | Negative                                     | Negative                                                   |
| 58                     | 73                 | Noncancerous prostate              | Positive                                     | Negative                                                   |
| 59                     | 68                 | Noncancerous prostate              | Positive                                     | Negative                                                   |
| 60                     | 78                 | Prostate cancer                    | Negative                                     | Positive                                                   |
| 61                     | 75                 | Noncancerous prostate              | Positive                                     | Negative                                                   |
| 62                     | 59                 | Noncancerous prostate              | Positive                                     | Negative                                                   |
| 63                     | 72                 | Noncancerous prostate              | Positive                                     | Negative                                                   |
| 64                     | 66                 | Prostate cancer                    | Negative                                     | Positive                                                   |
| 65                     | 63                 | Noncancerous prostate              | Positive                                     | Negative                                                   |
| 66                     | 78                 | Noncancerous prostate              | Positive                                     | Negative                                                   |
| 67                     | 68                 | Noncancerous prostate              | Positive                                     | Negative                                                   |
| 68                     | 63                 | Prostate cancer                    | Positive                                     | Positive                                                   |
| 69                     | 62                 | Noncancerous prostate              | Negative                                     | Negative                                                   |
| 70                     | 60                 | Noncancerous prostate              | Positive                                     | Negative                                                   |
| 71                     | 77                 | Noncancerous prostate              | Positive                                     | Negative                                                   |
| 72                     | 61                 | Noncancerous prostate              | Negative                                     | Negative                                                   |
| 73                     | 73                 | Noncancerous prostate              | Positive                                     | Negative                                                   |
| 74                     | 83                 | Prostate cancer                    | Negative                                     | Positive                                                   |
| 75                     | 66                 | Noncancerous prostate              | Positive                                     | Negative                                                   |
| 76                     | 62                 | Noncancerous prostate              | Negative                                     | Negative                                                   |
| 77                     | 77                 | Noncancerous prostate              | Positive                                     | Negative                                                   |
| 78                     | 61                 | Noncancerous prostate              | Positive                                     | Negative                                                   |
| 79                     | 56                 | Prostate cancer                    | Negative                                     | Positive                                                   |
| 80                     | 67                 | Noncancerous prostate              | Positive                                     | Negative                                                   |
| 81                     | 58                 | Noncancerous prostate              | Positive                                     | Negative                                                   |
| 82                     | 81                 | Noncancerous prostate              | Positive                                     | Negative                                                   |
| 83                     | 62                 | Prostate cancer                    | Negative                                     | Positive                                                   |
| 84                     | 71                 | Noncancerous prostate              | Positive                                     | Negative                                                   |
| 85                     | 63                 | Noncancerous prostate              | Negative                                     | Negative                                                   |
| 86                     | 57                 | Noncancerous prostate              | Positive                                     | Negative                                                   |
| 87                     | 64                 | Noncancerous prostate              | Negative                                     | Negative                                                   |
| 88                     | 62                 | Noncancerous prostate              | Negative                                     | Negative                                                   |
| 89                     | 69                 | Noncancerous prostate              | Positive                                     | Negative                                                   |
| 90                     | 76                 | Prostate cancer                    | Negative                                     | Positive                                                   |
| 91                     | 65                 | Noncancerous prostate              | Negative                                     | Negative                                                   |
| 92                     | 65                 | Noncancerous prostate              | Positive                                     | Negative                                                   |
| 93                     | 72                 | Prostate cancer                    | Negative                                     | Positive                                                   |
| 94                     | 67                 | Noncancerous prostate              | Negative                                     | Negative                                                   |
| 95                     | 75                 | Noncancerous prostate              | Positive                                     | Negative                                                   |
| 96                     | 62                 | Noncancerous prostate              | Negative                                     | Negative                                                   |
| 97                     | 62                 | Noncancerous prostate              | Negative                                     | Negative                                                   |
| 98                     | 69                 | Prostate cancer                    | Negative                                     | Positive                                                   |
| 99                     | 66                 | Noncancerous prostate              | Positive                                     | Negative                                                   |
| 100                    | 73                 | Noncancerous prostate              | Positive                                     | Negative                                                   |
| 101                    | 66                 | Noncancerous prostate              | Negative                                     | Negative                                                   |
| 102                    | 59                 | Noncancerous prostate              | Negative                                     | Negative                                                   |
| 103                    | 56                 | Noncancerous prostate              | Negative                                     | Negative                                                   |
| 104                    | 73                 | Noncancerous prostate              | Positive                                     | Negative                                                   |
| 105                    | 74                 | Noncancerous prostate              | Positive                                     | Negative                                                   |
| 106                    | 77                 | Prostate cancer                    | Negative                                     | Positive                                                   |
| 107                    | 64                 | Noncancerous prostate              | Negative                                     | Negative                                                   |
| 108                    | 71                 | Noncancerous prostate              | Positive                                     | Negative                                                   |
| 109                    | 62                 | Prostate cancer                    | Negative                                     | Positive                                                   |
| 110                    | 70                 | Noncancerous prostate              | Positive                                     | Negative                                                   |

Contd...

**Supplementary Table 1: Contd...**

| <i>Document number</i> | <i>Age (years)</i> | <i>Histopathological diagnoses</i> | <i>Prostatic calcifications on CT images</i> | <i>Hypointense on susceptibility-filtered phase images</i> |
|------------------------|--------------------|------------------------------------|----------------------------------------------|------------------------------------------------------------|
| 111                    | 64                 | Noncancerous prostate              | Positive                                     | Negative                                                   |
| 112                    | 63                 | Noncancerous prostate              | Positive                                     | Negative                                                   |
| 113                    | 58                 | Noncancerous prostate              | Negative                                     | Negative                                                   |
| 114                    | 78                 | Noncancerous prostate              | Positive                                     | Negative                                                   |
| 115                    | 63                 | Noncancerous prostate              | Negative                                     | Negative                                                   |
| 116                    | 66                 | Noncancerous prostate              | Positive                                     | Negative                                                   |
| 117                    | 72                 | Prostate cancer                    | Negative                                     | Positive                                                   |
| 118                    | 76                 | Noncancerous prostate              | Positive                                     | Negative                                                   |
| 119                    | 59                 | Noncancerous prostate              | Negative                                     | Negative                                                   |
| 120                    | 57                 | Prostate cancer                    | Positive                                     | Positive                                                   |
| 121                    | 80                 | Noncancerous prostate              | Positive                                     | Negative                                                   |
| 122                    | 68                 | Noncancerous prostate              | Negative                                     | Negative                                                   |
| 123                    | 70                 | Noncancerous prostate              | Positive                                     | Negative                                                   |
| 124                    | 74                 | Prostate cancer                    | Negative                                     | Positive                                                   |
| 125                    | 68                 | Noncancerous prostate              | Positive                                     | Negative                                                   |
| 126                    | 66                 | Noncancerous prostate              | Negative                                     | Negative                                                   |
| 127                    | 66                 | Noncancerous prostate              | Positive                                     | Negative                                                   |
| 128                    | 60                 | Noncancerous prostate              | Negative                                     | Negative                                                   |
| 129                    | 77                 | Noncancerous prostate              | Positive                                     | Negative                                                   |
| 130                    | 71                 | Prostate cancer                    | Negative                                     | Positive                                                   |
| 131                    | 62                 | Noncancerous prostate              | Positive                                     | Negative                                                   |
| 132                    | 69                 | Noncancerous prostate              | Positive                                     | Negative                                                   |
| 133                    | 70                 | Prostate cancer                    | Negative                                     | Positive                                                   |
| 134                    | 58                 | Noncancerous prostate              | Negative                                     | Negative                                                   |
| 135                    | 80                 | Noncancerous prostate              | Positive                                     | Negative                                                   |
| 136                    | 61                 | Noncancerous prostate              | Positive                                     | Negative                                                   |
| 137                    | 72                 | Noncancerous prostate              | Positive                                     | Negative                                                   |
| 138                    | 71                 | Noncancerous prostate              | Positive                                     | Negative                                                   |
| 139                    | 72                 | Prostate cancer                    | Negative                                     | Positive                                                   |
| 140                    | 72                 | Noncancerous prostate              | Positive                                     | Negative                                                   |
| 141                    | 65                 | Noncancerous prostate              | Positive                                     | Negative                                                   |
| 142                    | 56                 | Noncancerous prostate              | Negative                                     | Negative                                                   |
| 143                    | 65                 | Noncancerous prostate              | Positive                                     | Negative                                                   |
| 144                    | 67                 | Prostate cancer                    | Negative                                     | Positive                                                   |
| 145                    | 67                 | Noncancerous prostate              | Positive                                     | Negative                                                   |
| 146                    | 71                 | Noncancerous prostate              | Negative                                     | Negative                                                   |
| 147                    | 70                 | Noncancerous prostate              | Positive                                     | Negative                                                   |
| 148                    | 63                 | Noncancerous prostate              | Negative                                     | Negative                                                   |
| 149                    | 63                 | Prostate cancer                    | Negative                                     | Positive                                                   |
| 150                    | 81                 | Noncancerous prostate              | Positive                                     | Negative                                                   |
| 151                    | 61                 | Noncancerous prostate              | Negative                                     | Negative                                                   |
| 152                    | 78                 | Prostate cancer                    | Positive                                     | Positive                                                   |
| 153                    | 59                 | Noncancerous prostate              | Positive                                     | Negative                                                   |
| 154                    | 64                 | Noncancerous prostate              | Negative                                     | Negative                                                   |
| 155                    | 61                 | Noncancerous prostate              | Negative                                     | Negative                                                   |
| 156                    | 79                 | Noncancerous prostate              | Positive                                     | Negative                                                   |

CT: computed tomography
